# Supplementary material for: Immunoglobulin G Subclass Deficiencies in Adult Patients with Chronic Airway Diseases
Source: PubMed Central journal article supplement — J Korean Med Sci. 2016 Jun 29;31(10):1560–5. doi: 10.3346/jkms.2016.31.10.1560 (PMC4999397; doi:10.3346/jkms.2016.31.10.1560), 2016-06-29
Supplement: jkms-31-1560-s001.pdf [file jkms-31-1560-s001.pdf]

**Supplementary Table 1.** Proportion of patients who met the 10 warning signs for adults by Jeffrey Modell Foundation

| No. | Warning signs                                                             | Group I (n = 17) | Group II (n = 42) |
|-----|---------------------------------------------------------------------------|------------------|-------------------|
| 1   | Two or more new ear infections within 1 year                              | 1 (5.9)          | 0 (0.0)           |
| 2   | Two or more new sinus infections within 1 year, in the absence of allergy | 4 (23.5)         | 7 (16.7)          |
| 3   | One pneumonia per year for more than 1 year                               | 11 (64.7)        | 30 (71.4)         |
| 4   | Chronic diarrhea with weight loss                                         | 0 (0.0)          | 0 (0.0)           |
| 5   | Recurrent viral infections (colds, herpes, warts, condyloma)              | 6 (35.3)         | 11 (26.2)         |
| 6   | Recurrent need for intravenous antibiotics to clear infections            | 3 (17.6)         | 0 (0.0)           |
| 7   | Recurrent, deep abscesses of the skin or internal organs                  | 0 (0.0)          | 0 (0.0)           |
| 8   | Persistent thrush or fungal infection on skin or elsewhere                | 0 (0.0)          | 0 (0.0)           |
| 9   | Infection with normally harmless tuberculosis-like bacteria               | 0 (0.0)          | 0 (0.0)           |
| 10  | A family history of PI                                                    | 0 (0.0)          | 0 (0.0)           |
