# Supplementary material for: Immunoglobulin G Subclass Deficiencies in Adult Patients with Chronic Airway Diseases
Source: PubMed Central journal article supplement — J Korean Med Sci. 2016 Jun 29;31(10):1560–5. doi: 10.3346/jkms.2016.31.10.1560 (PMC4999397; doi:10.3346/jkms.2016.31.10.1560), 2016-06-29
Supplement: jkms-31-1560-s002.pdf [file jkms-31-1560-s002.pdf]

**Supplementary Table 2.** Frequency of infection, hospitalization and exacerbation according to the obstructive airway diseases (asthma, ACOS, and COPD)

| Group and variables       | Asthma    | ACOS      | COPD      | P value |
|---------------------------|-----------|-----------|-----------|---------|
| Group I                   | n = 4     | n = 3     | n = 10    |         |
| No. of infection/yr       | 4.5 ± 1.6 | 2.8 ± 0.4 | 3.8 ± 2.2 | 0.315   |
| No. of hospitalization/yr | 1.4 ± 1.6 | 1.0 ± 0.5 | 1.0 ± 0.9 | 0.885   |
| No. of exacerbation/yr    | 1.5 ± 1.1 | 1.8 ± 0.3 | 2.9 ± 2.1 | 0.415   |
| Group II                  | n = 16    | n = 6     | n = 20    |         |
| No. of infection/yr       | 1.0 ± 0.6 | 1.0 ± 0.7 | 1.3 ± 0.6 | 0.116   |
| No. of hospitalization/yr | 0.3 ± 0.4 | 0.3 ± 0.2 | 0.5 ± 0.5 | 0.223   |
| No. of exacerbation/yr    | 0.5 ± 0.5 | 0.7 ± 0.6 | 0.7 ± 0.5 | 0.694   |

ACOS, asthma COPD overlap syndrome; COPD, chronic obstructive pulmonary disease.
