# Supplementary material for: Immunoglobulin G Subclass Deficiencies in Adult Patients with Chronic Airway Diseases
Source: PubMed Central journal article supplement — J Korean Med Sci. 2016 Jun 29;31(10):1560–5. doi: 10.3346/jkms.2016.31.10.1560 (PMC4999397; doi:10.3346/jkms.2016.31.10.1560), 2016-06-29
Supplement: jkms-31-1560-s003.pdf [file jkms-31-1560-s003.pdf]

**Supplementary Table 3.** Immunoglobulin G subclass deficiency of the patients with asthma, ACOS, and COPD

| IgG subclasses (normal range) | No. (%) of deficient patients |              |               | P value |
|-------------------------------|-------------------------------|--------------|---------------|---------|
|                               | Asthma (n = 20)               | ACOS (n = 9) | COPD (n = 30) |         |
| IgG1 (382.4-928.6 mg/dL)      | 1 (4.5)                       | 0 (0.0)      | 0 (0.0)       | 0.398   |
| IgG2 (241.8-700.3 mg/dL)      | 0 (0.0)                       | 0 (0.0)      | 1 (3.1)       | 0.612   |
| IgG3 (21.8-176.1 mg/dL)       | 19 (86.4)                     | 8 (88.9)     | 25 (78.1)     | 0.397   |
| IgG4 (3.9-86.4 mg/dL)         | 2 (9.1)                       | 1 (11.1)     | 6 (18.8)      | 0.576   |
