# Supplementary material for: Immunoglobulin G Subclass Deficiencies in Adult Patients with Chronic Airway Diseases
Source: PubMed Central journal article supplement — J Korean Med Sci. 2016 Jun 29;31(10):1560–5. doi: 10.3346/jkms.2016.31.10.1560 (PMC4999397; doi:10.3346/jkms.2016.31.10.1560), 2016-06-29
Supplement: jkms-31-1560-s004.pdf [file jkms-31-1560-s004.pdf]

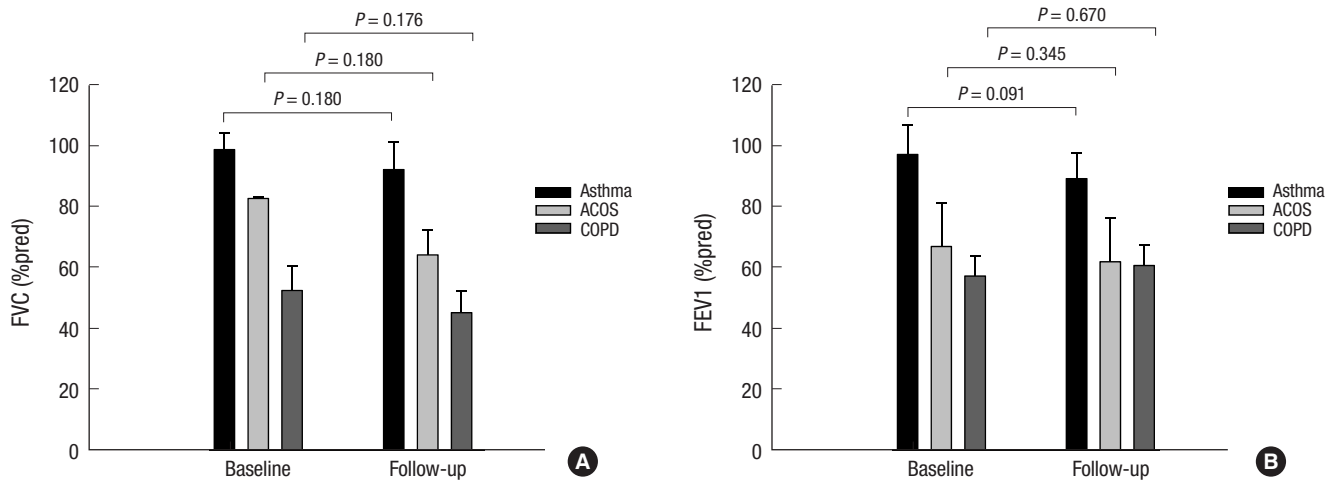

**Supplementary Fig. 1.** FEV1% predicted in patients with asthma, ACOS, and COPD at baseline and follow-up visit in group I (A) and group II (B).
